# Supplementary material for: Production and Characterization of Red Fruit Spirits Made from Red Raspberries, Blueberries, and Strawberries
Source: MDPI journal article supplement (doi:10.3390/foods13081187), 2024-04-13
Supplement: s1 [file s1]

*Article*

# **Production and Characterization of Red Fruit Spirits Made from Red Raspberries, Blueberries, and Strawberries**

**Mário Bezerra<sup>1</sup>, Fernanda Cosme<sup>1,2</sup>, Fernando M. Nunes<sup>1,3\*</sup>**

<sup>1</sup> Chemistry Research Centre-Vila Real (CQ-VR), Food and Wine Chemistry Laboratory, University of Trás-os-Montes and Alto Douro, 5000-801 Vila Real, Portugal

<sup>2</sup> Biology and Environment Department, School of Life Sciences and Environment, University of Trás-os-Montes and Alto Douro, 5000-801 Vila Real, Portugal

<sup>3</sup> Chemistry Department, School of Life Sciences and Environment, University of Trás-os-Montes and Alto Douro, 5000-801 Vila Real, Portugal

\*Correspondence: [fnunes@utad.pt](mailto:fnunes@utad.pt)

## **Supplementary Material**

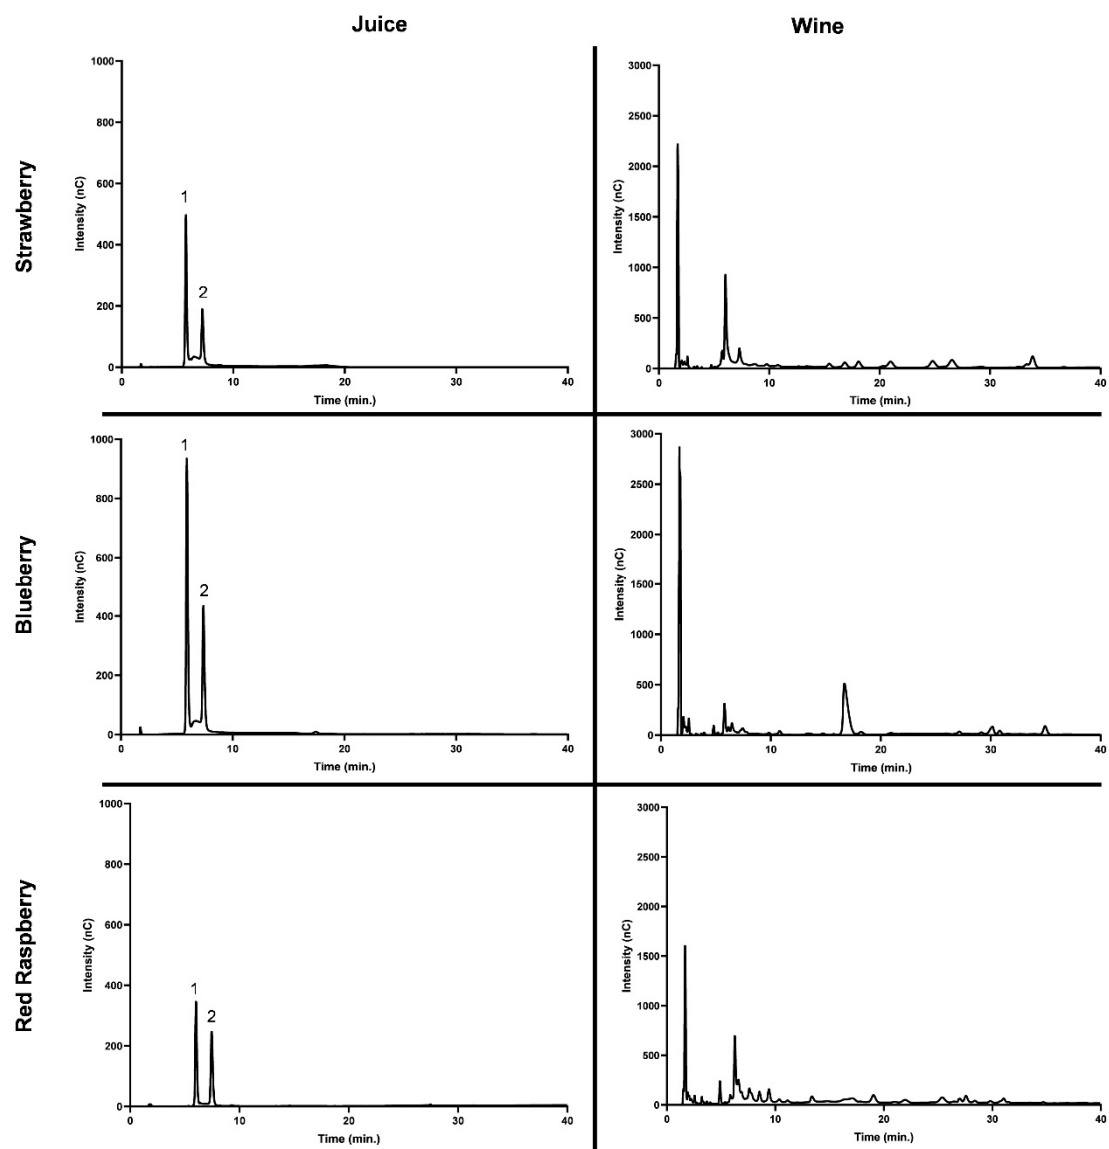

**Supplementary Figure S1** HPAEC-PAD chromatograms of strawberry, blueberry and red raspberry juices (dilution 1:500) and wines (dilution 1:2). Glucose (1) and fucose (2) were identified by comparison with commercial pure standards.

**Supplementary Table S1** Ethanol concentration (% v/v) of red raspberry, blueberry, and strawberry was determined for each 100 mL distilled fraction until reaching 0.00 % v/v. The values are represented as mean  $\pm$  standard deviation (n=2) of ethanol content.

| Fraction | Red Raspberry |       |   | Strawberry |       |   | Blueberry |       |   |
|----------|---------------|-------|---|------------|-------|---|-----------|-------|---|
|          | mean          | sd    | n | mean       | sd    | n | mean      | sd    | n |
| 1        | 38.277        | 0.268 | 2 | 39.029     | 0.319 | 2 | 49.808    | 0.024 | 2 |
| 2        | 34.955        | 0.252 | 2 | 33.607     | 0.107 | 2 | 44.737    | 0.031 | 2 |
| 3        | 31.835        | 0.257 | 2 | 30.796     | 0.045 | 2 | 42.596    | 0.099 | 2 |
| 4        | 28.119        | 1.022 | 2 | 28.399     | 0.005 | 2 | 40.059    | 0.351 | 2 |
| 5        | 25.402        | 1.015 | 2 | 25.915     | 0.122 | 2 | 37.227    | 0.786 | 2 |
| 6        | 22.702        | 1.346 | 2 | 23.12      | 0.661 | 2 | 34.838    | 0.763 | 2 |
| 7        | 19.970        | 1.423 | 2 | 21.013     | 0.174 | 2 | 32.104    | 0.917 | 2 |
| 8        | 17.601        | 1.366 | 2 | 18.756     | 0.223 | 2 | 29.073    | 0.905 | 2 |
| 9        | 15.252        | 1.279 | 2 | 16.611     | 0.110 | 2 | 26.329    | 0.783 | 2 |
| 10       | 13.195        | 1.139 | 2 | 14.670     | 0.157 | 2 | 23.906    | 0.861 | 2 |
| 11       | 11.084        | 0.859 | 2 | 12.780     | 0.050 | 2 | 21.534    | 0.687 | 2 |
| 12       | 9.431         | 0.748 | 2 | 11.106     | 0.097 | 2 | 19.286    | 0.989 | 2 |
| 13       | 8.032         | 0.655 | 2 | 9.538      | 0.044 | 2 | 17.326    | 0.853 | 2 |
| 14       | 6.878         | 0.583 | 2 | 8.153      | 0.102 | 2 | 15.590    | 0.600 | 2 |
| 15       | 5.723         | 0.534 | 2 | 6.826      | 0.060 | 2 | 13.562    | 0.807 | 2 |
| 16       | 4.734         | 0.507 | 2 | 5.799      | 0.047 | 2 | 11.849    | 0.771 | 2 |
| 17       | 3.895         | 0.444 | 2 | 4.850      | 0.032 | 2 | 10.090    | 0.637 | 2 |
| 18       | 3.193         | 0.443 | 2 | 4.093      | 0.004 | 2 | 8.690     | 0.939 | 2 |
| 19       | 2.565         | 0.395 | 2 | 3.373      | 0.032 | 2 | 7.209     | 0.780 | 2 |
| 20       | 2.058         | 0.380 | 2 | 2.787      | 0.024 | 2 | 6.002     | 0.687 | 2 |
| 21       | 1.660         | 0.300 | 2 | 2.294      | 0.022 | 2 | 4.992     | 0.597 | 2 |
| 22       | 1.326         | 0.265 | 2 | 1.850      | 0.020 | 2 | 4.128     | 0.487 | 2 |
| 23       | 1.058         | 0.229 | 2 | 1.504      | 0.018 | 2 | 3.364     | 0.393 | 2 |
| 24       | 0.864         | 0.176 | 2 | 1.199      | 0.006 | 2 | 2.745     | 0.305 | 2 |
| 25       | 0.666         | 0.160 | 2 | 0.957      | 0.015 | 2 | 2.306     | 0.266 | 2 |
| 26       | 0.514         | 0.131 | 2 | 0.759      | 0.012 | 2 | 1.872     | 0.214 | 2 |
| 27       | 0.395         | 0.104 | 2 | 0.596      | 0.014 | 2 | 1.516     | 0.207 | 2 |
| 28       | 0.296         | 0.090 | 2 | 0.455      | 0.005 | 2 | 1.196     | 0.164 | 2 |
| 29       | 0.215         | 0.074 | 2 | 0.341      | 0.001 | 2 | 0.962     | 0.127 | 2 |
| 30       | 0.152         | 0.057 | 2 | 0.254      | 0.000 | 2 | 0.819     | 0.024 | 2 |
| 31       | 0.104         | 0.045 | 2 | 0.185      | 0.003 | 2 | 0.640     | 0.015 | 2 |
| 32       | 0.064         | 0.036 | 2 | 0.128      | 0.003 | 2 | 0.475     | 0.004 | 2 |
| 33       | 0.030         | 0.030 | 2 | 0.083      | 0.003 | 2 | 0.370     | 0.012 | 2 |
| 34       | 0.031         | 0.000 | 2 | 0.049      | 0.004 | 2 | 0.274     | 0.010 | 2 |
| 35       | 0.008         | 0.000 | 2 | 0.026      | 0.007 | 2 | 0.200     | 0.010 | 2 |
| 36       | 0.000         | 0.000 | 2 | 0.004      | 0.004 | 2 | 0.149     | 0.005 | 2 |
| 37       | -             | -     | - | 0.000      | 0.000 | 2 | 0.105     | 0.000 | 2 |
| 38       | -             | -     | - | -          | -     | - | 0.071     | 0.001 | 2 |
| 39       | -             | -     | - | -          | -     | - | 0.000     | 0.000 | 2 |

**Supplementary Table S2** Concentration (mg/L) of major congeners and ethanol content (% v/v) of red raspberry, blueberry, and strawberry in each 100 mL distilled fraction. The values are represented as mean  $\pm$  standard deviation (n=2), and the distillation cuts are represented as “heart” or “tail” fraction.

|               |    | Acetaldehyde |       |   | Ethyl Acetate |       |   | Methanol |       |   | Propanol |       |   | Isobutanol |       |   | 3-Metil_Butanol |       |   | Ethanol (% v/v) |        |   |
|---------------|----|--------------|-------|---|---------------|-------|---|----------|-------|---|----------|-------|---|------------|-------|---|-----------------|-------|---|-----------------|--------|---|
|               |    | mean         | sd    | n | mean          | sd    | n | mean     | sd    | n | mean     | sd    | n | mean       | sd    | n | mean            | sd    | n | mean            | sd     | n |
| Red Raspberry |    |              |       |   |               |       |   |          |       |   |          |       |   |            |       |   |                 |       |   |                 |        |   |
| heart         | 1  | 917,637      | 0,174 | 2 | 1485,302      | 0,281 | 2 | 2899,719 | 0,587 | 2 | 459,898  | 0,087 | 2 | 409,500    | 0,068 | 2 | 717,768         | 0,096 | 2 | 38,277          | 0.268  | 2 |
|               | 2  | 517,530      | 0,098 | 2 | 852,669       | 0,162 | 2 | 2325,502 | 0,441 | 2 | 355,682  | 0,067 | 2 | 280,369    | 0,049 | 2 | 500,779         | 0,079 | 2 | 34,956          | 0.2525 | 2 |
| tail          | 3  | 182,651      | 0,035 | 2 | 537,689       | 0,102 | 2 | 2472,506 | 0,469 | 2 | 342,763  | 0,065 | 2 | 217,170    | 0,039 | 2 | 394,577         | 0,066 | 2 | 31.835          | 0.257  | 2 |
|               | 4  | 194,213      | 0,037 | 2 | 550,017       | 0,104 | 2 | 2494,931 | 0,473 | 2 | 367,498  | 0,070 | 2 | 203,462    | 0,036 | 2 | 328,900         | 0,056 | 2 | 28.119          | 1.022  | 2 |
|               | 5  | 119,747      | 0,023 | 2 | 247,474       | 0,047 | 2 | 2517,796 | 0,477 | 2 | 216,190  | 0,041 | 2 | 112,312    | 0,021 | 2 | 192,394         | 0,035 | 2 | 25.402          | 1.015  | 2 |
|               | 6  | 57,235       | 0,011 | 2 | 435,019       | 0,082 | 2 | 1654,932 | 0,314 | 2 | 173,184  | 0,033 | 2 | 71,943     | 0,013 | 2 | 121,930         | 0,022 | 2 | 22.7025         | 1.3465 | 2 |
|               | 7  | 54,013       | 0,010 | 2 | 365,526       | 0,069 | 2 | 1918,383 | 0,364 | 2 | 156,153  | 0,030 | 2 | 53,226     | 0,010 | 2 | 82,017          | 0,015 | 2 | 19.97           | 1.423  | 2 |
|               | 8  | 27,036       | 0,005 | 2 | 594,666       | 0,113 | 2 | 1779,456 | 0,337 | 2 | 144,395  | 0,027 | 2 | 39,478     | 0,007 | 2 | 58,122          | 0,011 | 2 | 17.6015         | 1.3665 | 2 |
|               | 9  | 34,475       | 0,007 | 2 | 376,101       | 0,071 | 2 | 1918,832 | 0,364 | 2 | 115,555  | 0,022 | 2 | 24,363     | 0,005 | 2 | 34,422          | 0,006 | 2 | 15.252          | 1.279  | 2 |
|               | 10 | 29,117       | 0,006 | 2 | 587,646       | 0,111 | 2 | 1103,974 | 0,209 | 2 | 143,149  | 0,027 | 2 | 21,968     | 0,004 | 2 | 27,837          | 0,005 | 2 | 13.1955         | 1.1395 | 2 |
|               | 11 | 31,835       | 0,006 | 2 | 471,307       | 0,089 | 2 | 1995,546 | 0,378 | 2 | 90,833   | 0,017 | 2 | 10,634     | 0,002 | 2 | 13,510          | 0,003 | 2 | 11.0845         | 0.8595 | 2 |
|               | 12 | 22,151       | 0,004 | 2 | 179,034       | 0,034 | 2 | 1410,207 | 0,267 | 2 | 45,591   | 0,009 | 2 | 5,133      | 0,001 | 2 | 5,486           | 0,001 | 2 | 9.4315          | 0.7485 | 2 |
|               | 13 | 14,481       | 0,003 | 2 | 297,438       | 0,056 | 2 | 1127,855 | 0,214 | 2 | 34,217   | 0,006 | 2 | 2,578      | 0,000 | 2 | 0,296           | 0,000 | 2 | 8.032           | 0.655  | 2 |
|               | 14 | 33,305       | 0,006 | 2 | 471,454       | 0,089 | 2 | 866,266  | 0,164 | 2 | 25,949   | 0,005 | 2 | -          | -     | - | 2,174           | 0,000 | 2 | 6.8785          | 0.5835 | 2 |
|               | 15 | 18,949       | 0,004 | 2 | 629,030       | 0,119 | 2 | 555,483  | 0,105 | 2 | 24,090   | 0,005 | 2 | -          | -     | - | -               | -     | - | 5.723           | 0.534  | 2 |
|               | 16 | 13,669       | 0,003 | 2 | 483,503       | 0,092 | 2 | 463,004  | 0,088 | 2 | 15,331   | 0,003 | 2 | -          | -     | - | -               | -     | - | 4.734           | 0.507  | 2 |
|               | 17 | 13,374       | 0,003 | 2 | 489,456       | 0,093 | 2 | 408,181  | 0,077 | 2 | 16,267   | 0,003 | 2 | -          | -     | - | -               | -     | - | 3.895           | 0.444  | 2 |
|               | 18 | 12,788       | 0,002 | 2 | 104,822       | 0,072 | 2 | 676,002  | 0,066 | 2 | 5,514    | 0,001 | 2 | -          | -     | - | -               | -     | - | 3.1935          | 0.4435 | 2 |
|               | 19 | 11,111       | 0,004 | 2 | 380,654       | 0,073 | 2 | 348,441  | 0,083 | 2 | 6,625    | 0,001 | 2 | -          | -     | - | -               | -     | - | 2.565           | 0.395  | 2 |
|               | 20 | 21,885       | 0,003 | 2 | 383,167       | 0,023 | 2 | 437,466  | 0,089 | 2 | 6,959    | 0,000 | 2 | -          | -     | - | -               | -     | - | 2.058           | 0.38   | 2 |
|               | 21 | 15,879       | 0,003 | 2 | 120,480       | 0,053 | 2 | 470,716  | 0,051 | 2 | -        | -     | - | -          | -     | - | -               | -     | - | 1.6605          | 0.3005 | 2 |
|               | 22 | 17,970       | 0,003 | 2 | 279,042       | 0,035 | 2 | 269,244  | 0,038 | 2 | -        | -     | - | -          | -     | - | -               | -     | - | 1.3265          | 0.2645 | 2 |
|               | 23 | 14,204       | 0,001 | 2 | 185,530       | 0,023 | 2 | 202,898  | 0,037 | 2 | -        | -     | - | -          | -     | - | -               | -     | - | 1.058           | 0.229  | 2 |

|           |    |         |       |   |         |       |   |         |       |   |         |       |   |         |       |   |          |       |        |        |       |   |
|-----------|----|---------|-------|---|---------|-------|---|---------|-------|---|---------|-------|---|---------|-------|---|----------|-------|--------|--------|-------|---|
|           | 24 | 7,113   | 0,004 | 2 | 119,820 | 0,029 | 2 | 197,651 | 0,050 | 2 | -       | -     | - | -       | -     | - | -        | -     | 0.864  | 0.176  | 2     |   |
|           | 25 | 18,480  | 0,004 | 2 | 155,350 | 0,019 | 2 | 262,533 | 0,005 | 2 | -       | -     | - | -       | -     | - | -        | -     | 0.6665 | 0.1605 | 2     |   |
|           | 26 | 18,884  | 0,002 | 2 | 139,658 | 0,025 | 2 | 118,301 | 0,026 | 2 | -       | -     | - | -       | -     | - | -        | -     | 0.5145 | 0.1315 | 2     |   |
|           | 27 | 11,884  | 0,002 | 2 | 132,902 | 0,022 | 2 | 139,150 | 0,017 | 2 | -       | -     | - | -       | -     | - | -        | -     | 0.3955 | 0.1045 | 2     |   |
|           | 28 | 8,429   | 0,000 | 2 | 113,894 | 0,021 | 2 | 90,486  | 0,023 | 2 | -       | -     | - | -       | -     | - | -        | -     | 0.296  | 0.09   | 2     |   |
|           | 29 | 1,578   | 0,004 | 2 | 110,257 | 0,018 | 2 | 121,091 | 0,018 | 2 | -       | -     | - | -       | -     | - | -        | -     | 0.215  | 0.074  | 2     |   |
|           | 30 | 21,325  | 0,000 | 2 | 95,155  | 0,026 | 2 | 93,893  | 0,022 | 2 | -       | -     | - | -       | -     | - | -        | -     | 0.1525 | 0.0575 | 2     |   |
|           | 31 | -       | -     | - | 100,746 | 0,011 | 2 | 127,797 | 0,019 | 2 | -       | -     | - | -       | -     | - | -        | -     | 0.104  | 0.045  | 2     |   |
|           | 32 | -       | -     | - | 56,616  | 0,011 | 2 | 101,755 | 0,020 | 2 | -       | -     | - | -       | -     | - | -        | -     | 0.0645 | 0.0365 | 2     |   |
|           | 33 | -       | -     | - | 56,109  | 0,015 | 2 | 106,321 | 0,024 | 2 | -       | -     | - | -       | -     | - | -        | -     | 0.0305 | 0.0305 | 2     |   |
|           | 34 | -       | -     | - | 66,775  | 0,013 | 2 | 66,960  | 0,013 | 2 | -       | -     | - | -       | -     | - | -        | -     | 0.031  | 0,000  | 2     |   |
|           | 35 | -       | -     | - | 57,922  | 0,019 | 2 | 60,933  | 0,019 | 2 | -       | -     | - | -       | -     | - | -        | -     | 0.008  | 0,000  | 2     |   |
| Blueberry |    |         |       |   |         |       |   |         |       |   |         |       |   |         |       |   |          |       |        |        |       |   |
| heart     | 1  | 321,417 | 0,061 | 2 | 193,044 | 0,037 | 2 | 487,997 | 0,092 | 2 | 309,074 | 0,059 | 2 | 451,206 | 0,073 | 2 | 1002,358 | 0,061 | 2      | 49,809 | 0,025 | 2 |
|           | 2  | 312,834 | 0,059 | 2 | 174,697 | 0,033 | 2 | 742,349 | 0,141 | 2 | 311,631 | 0,059 | 2 | 393,710 | 0,066 | 2 | 1002,460 | 0,047 | 2      | 44,737 | 0,031 | 2 |
|           | 3  | 224,261 | 0,042 | 2 | 271,847 | 0,052 | 2 | 644,106 | 0,122 | 2 | 288,421 | 0,055 | 2 | 346,344 | 0,059 | 2 | 942,726  | 0,078 | 2      | 42,596 | 0,099 | 2 |
|           | 4  | 87,301  | 0,017 | 2 | 123,524 | 0,023 | 2 | 723,842 | 0,137 | 2 | 255,997 | 0,049 | 2 | 266,438 | 0,047 | 2 | 860,873  | 0,093 | 2      | 40,059 | 0,351 | 2 |
|           | 5  | 78,129  | 0,015 | 2 | 133,142 | 0,025 | 2 | 674,336 | 0,128 | 2 | 211,512 | 0,040 | 2 | 193,379 | 0,035 | 2 | 626,129  | 0,091 | 2      | 37,227 | 0,786 | 2 |
|           | 6  | 42,457  | 0,008 | 2 | 107,803 | 0,020 | 2 | 776,835 | 0,147 | 2 | 175,424 | 0,033 | 2 | 140,949 | 0,026 | 2 | 464,947  | 0,075 | 2      | 34,838 | 0,763 | 2 |
|           | 7  | 27,631  | 0,005 | 2 | 182,969 | 0,035 | 2 | 449,074 | 0,085 | 2 | 167,134 | 0,032 | 2 | 107,641 | 0,020 | 2 | 360,057  | 0,061 | 2      | 32,105 | 0,918 | 2 |
| tail      | 8  | 17,311  | 0,003 | 2 | 121,411 | 0,023 | 2 | 634,223 | 0,120 | 2 | 160,591 | 0,030 | 2 | 95,201  | 0,018 | 2 | 304,143  | 0,053 | 2      | 29,073 | 0,905 | 2 |
|           | 9  | 6,660   | 0,001 | 2 | 99,736  | 0,019 | 2 | 589,068 | 0,112 | 2 | 119,863 | 0,023 | 2 | 52,584  | 0,010 | 2 | 168,837  | 0,031 | 2      | 26,330 | 0,784 | 2 |
|           | 10 | 5,612   | 0,001 | 2 | 98,775  | 0,019 | 2 | 520,333 | 0,099 | 2 | 95,127  | 0,018 | 2 | 36,878  | 0,007 | 2 | 110,890  | 0,020 | 2      | 23,906 | 0,861 | 2 |
|           | 11 | 5,924   | 0,001 | 2 | 97,601  | 0,018 | 2 | 476,324 | 0,090 | 2 | 80,347  | 0,015 | 2 | 27,707  | 0,005 | 2 | 86,361   | 0,016 | 2      | 21,534 | 0,687 | 2 |
|           | 12 | -       | -     | - | 90,887  | 0,017 | 2 | 450,049 | 0,085 | 2 | 65,440  | 0,012 | 2 | 17,551  | 0,003 | 2 | 51,614   | 0,010 | 2      | 19,286 | 0,989 | 2 |
|           | 13 | -       | -     | - | 162,098 | 0,031 | 2 | 320,878 | 0,061 | 2 | 60,549  | 0,011 | 2 | 12,546  | 0,002 | 2 | 36,826   | 0,007 | 2      | 17,327 | 0,854 | 2 |
|           | 14 | -       | -     | - | 99,153  | 0,019 | 2 | 402,767 | 0,076 | 2 | 39,421  | 0,007 | 2 | 4,612   | 0,001 | 2 | 13,524   | 0,003 | 2      | 15,591 | 0,601 | 2 |
|           | 15 | -       | -     | - | 91,997  | 0,017 | 2 | 369,693 | 0,070 | 2 | 33,504  | 0,006 | 2 | 3,198   | 0,001 | 2 | 10,894   | 0,002 | 2      | 13,562 | 0,807 | 2 |
|           | 16 | -       | -     | - | 140,234 | 0,027 | 2 | 341,898 | 0,065 | 2 | 28,916  | 0,005 | 2 | 0,000   | 0,000 | 2 | 6,723    | 0,001 | 2      | 11,850 | 0,772 | 2 |

|                   |    |         |       |   |         |       |   |          |       |   |         |       |   |         |       |   |          |       |   |        |       |   |
|-------------------|----|---------|-------|---|---------|-------|---|----------|-------|---|---------|-------|---|---------|-------|---|----------|-------|---|--------|-------|---|
|                   | 17 | -       | -     | - | 128,318 | 0,024 | 2 | 261,925  | 0,050 | 2 | 20,568  | 0,004 | 2 | -       | -     | - | 3,340    | 0,001 | 2 | 10,091 | 0,638 | 2 |
|                   | 18 | -       | -     | - | 99,783  | 0,019 | 2 | 248,101  | 0,047 | 2 | 14,571  | 0,003 | 2 | -       | -     | - | -        | -     | - | 8,690  | 0,939 | 2 |
|                   | 19 | -       | -     | - | 113,461 | 0,022 | 2 | 161,774  | 0,031 | 2 | 10,007  | 0,002 | 2 | -       | -     | - | -        | -     | - | 7,210  | 0,781 | 2 |
|                   | 20 | -       | -     | - | 108,387 | 0,021 | 2 | 134,979  | 0,026 | 2 | 8,562   | 0,002 | 2 | -       | -     | - | -        | -     | - | 6,003  | 0,688 | 2 |
|                   | 21 | -       | -     | - | 71,763  | 0,014 | 2 | 175,415  | 0,033 | 2 | -       | -     | - | -       | -     | - | -        | -     | - | 4,993  | 0,598 | 2 |
|                   | 22 | -       | -     | - | 68,166  | 0,013 | 2 | 132,418  | 0,025 | 2 | -       | -     | - | -       | -     | - | -        | -     | - | 4,129  | 0,488 | 2 |
|                   | 23 | -       | -     | - | 73,001  | 0,014 | 2 | 126,905  | 0,024 | 2 | -       | -     | - | -       | -     | - | -        | -     | - | 3,364  | 0,393 | 2 |
|                   | 24 | -       | -     | - | 70,511  | 0,013 | 2 | 105,350  | 0,020 | 2 | -       | -     | - | -       | -     | - | -        | -     | - | 2,746  | 0,306 | 2 |
|                   | 25 | -       | -     | - | 76,022  | 0,014 | 2 | 69,125   | 0,013 | 2 | -       | -     | - | -       | -     | - | -        | -     | - | 2,306  | 0,266 | 2 |
|                   | 26 | -       | -     | - | 60,081  | 0,011 | 2 | 71,436   | 0,014 | 2 | -       | -     | - | -       | -     | - | -        | -     | - | 1,873  | 0,215 | 2 |
|                   | 27 | -       | -     | - | 40,907  | 0,008 | 2 | 81,254   | 0,015 | 2 | -       | -     | - | -       | -     | - | -        | -     | - | 1,516  | 0,207 | 2 |
|                   | 28 | -       | -     | - | 0,000   | 0,000 | 2 | 111,614  | 0,021 | 2 | -       | -     | - | -       | -     | - | -        | -     | - | 1,197  | 0,165 | 2 |
|                   | 29 | -       | -     | - | 29,921  | 0,006 | 2 | 51,670   | 0,010 | 2 | -       | -     | - | -       | -     | - | -        | -     | - | 0,963  | 0,128 | 2 |
|                   | 30 | -       | -     | - | 0,000   | 0,000 | 2 | 92,960   | 0,018 | 2 | -       | -     | - | -       | -     | - | -        | -     | - | 0,820  | 0,025 | 2 |
|                   | 31 | -       | -     | - | 23,347  | 0,004 | 2 | 37,244   | 0,007 | 2 | -       | -     | - | -       | -     | - | -        | -     | - | 0,640  | 0,015 | 2 |
|                   | 32 | -       | -     | - | 19,359  | 0,004 | 2 | 34,186   | 0,006 | 2 | -       | -     | - | -       | -     | - | -        | -     | - | 0,476  | 0,005 | 2 |
|                   | 33 | -       | -     | - | 37,429  | 0,007 | 2 | 106,471  | 0,020 | 2 | -       | -     | - | -       | -     | - | -        | -     | - | 0,371  | 0,013 | 2 |
|                   | 34 | -       | -     | - | 12,836  | 0,002 | 2 | 35,063   | 0,007 | 2 | -       | -     | - | -       | -     | - | -        | -     | - | 0,274  | 0,010 | 2 |
|                   | 35 | -       | -     | - | 19,853  | 0,004 | 2 | 30,916   | 0,006 | 2 | -       | -     | - | -       | -     | - | -        | -     | - | 0,201  | 0,011 | 2 |
|                   | 36 | -       | -     | - | 17,453  | 0,003 | 2 | 20,510   | 0,004 | 2 | -       | -     | - | -       | -     | - | -        | -     | - | 0,149  | 0,005 | 2 |
|                   | 37 | -       | -     | - | 11,737  | 0,002 | 2 | 14,906   | 0,003 | 2 | -       | -     | - | -       | -     | - | -        | -     | - | 0,106  | 0,001 | 2 |
|                   | 38 | -       | -     | - | 6,966   | 0,002 | 2 | 15,787   | 0,004 | 2 | -       | -     | - | -       | -     | - | -        | -     | - | 0,072  | 0,002 | 2 |
| <b>Strawberry</b> |    |         |       |   |         |       |   |          |       |   |         |       |   |         |       |   |          |       |   |        |       |   |
| heart             | 1  | 428,301 | 0,081 | 2 | 707,315 | 0,134 | 2 | 3432,834 | 0,651 | 2 | 473,333 | 0,090 | 2 | 421,590 | 0,069 | 2 | 1022,061 | 0,004 | 2 | 39,030 | 0,320 | 2 |
| tail              | 2  | 333,810 | 0,063 | 2 | 703,262 | 0,133 | 2 | 4261,978 | 0,808 | 2 | 384,605 | 0,073 | 2 | 264,903 | 0,046 | 2 | 1005,490 | 0,044 | 2 | 33,608 | 0,108 | 2 |
|                   | 3  | 140,836 | 0,027 | 2 | 694,163 | 0,132 | 2 | 3098,252 | 0,587 | 2 | 378,899 | 0,072 | 2 | 119,763 | 0,701 | 2 | 1005,826 | 0,043 | 2 | 30,796 | 0,045 | 2 |
|                   | 4  | 114,558 | 0,022 | 2 | 691,942 | 0,131 | 2 | 4211,224 | 0,798 | 2 | 362,746 | 0,069 | 2 | 205,002 | 0,037 | 2 | 691,974  | 0,095 | 2 | 28,400 | 0,006 | 2 |

|    |        |       |   |         |       |   |          |       |   |         |       |   |         |       |   |         |       |   |        |       |   |
|----|--------|-------|---|---------|-------|---|----------|-------|---|---------|-------|---|---------|-------|---|---------|-------|---|--------|-------|---|
| 5  | 70,551 | 0,013 | 2 | 414,912 | 0,079 | 2 | 2401,154 | 0,455 | 2 | 212,460 | 0,040 | 2 | 114,955 | 0,021 | 2 | 389,495 | 0,065 | 2 | 25,916 | 0,123 | 2 |
| 6  | 32,425 | 0,006 | 2 | 512,817 | 0,097 | 2 | 1715,427 | 0,325 | 2 | 168,664 | 0,032 | 2 | 76,878  | 0,014 | 2 | 261,984 | 0,046 | 2 | 23,120 | 0,661 | 2 |
| 7  | 20,423 | 0,004 | 2 | 717,600 | 0,136 | 2 | 1073,772 | 0,203 | 2 | 145,145 | 0,028 | 2 | 53,287  | 0,010 | 2 | 175,939 | 0,032 | 2 | 21,014 | 0,175 | 2 |
| 8  | 38,042 | 0,007 | 2 | 554,202 | 0,105 | 2 | 1364,079 | 0,258 | 2 | 117,747 | 0,022 | 2 | 35,995  | 0,007 | 2 | 114,329 | 0,021 | 2 | 18,756 | 0,223 | 2 |
| 9  | -      | -     | - | 317,677 | 0,060 | 2 | 1313,202 | 0,249 | 2 | 113,749 | 0,022 | 2 | 27,445  | 0,005 | 2 | 81,853  | 0,015 | 2 | 16,612 | 0,111 | 2 |
| 10 | -      | -     | - | 399,045 | 0,076 | 2 | 1690,361 | 0,320 | 2 | 89,730  | 0,017 | 2 | 16,762  | 0,003 | 2 | 47,431  | 0,009 | 2 | 14,671 | 0,158 | 2 |
| 11 | -      | -     | - | 296,243 | 0,056 | 2 | 1593,245 | 0,302 | 2 | 63,727  | 0,012 | 2 | 12,462  | 0,002 | 2 | 36,284  | 0,007 | 2 | 12,781 | 0,051 | 2 |
| 12 | -      | -     | - | 256,861 | 0,049 | 2 | 1144,092 | 0,217 | 2 | 70,012  | 0,013 | 2 | 8,646   | 0,002 | 2 | 19,703  | 0,004 | 2 | 11,107 | 0,098 | 2 |
| 13 | -      | -     | - | 168,897 | 0,032 | 2 | 292,233  | 0,055 | 2 | 60,861  | 0,012 | 2 | 14,459  | 0,003 | 2 | 37,365  | 0,007 | 2 | 9,538  | 0,044 | 2 |
| 14 | -      | -     | - | 402,028 | 0,076 | 2 | 1212,586 | 0,230 | 2 | 36,204  | 0,007 | 2 | 6,784   | 0,001 | 2 | 6,348   | 0,001 | 2 | 8,153  | 0,102 | 2 |
| 15 | -      | -     | - | 424,873 | 0,081 | 2 | 1083,929 | 0,205 | 2 | 59,467  | 0,011 | 2 | -       | -     | - | -       | -     | - | 6,826  | 0,060 | 2 |
| 16 | -      | -     | - | 477,873 | 0,091 | 2 | 776,624  | 0,147 | 2 | 11,810  | 0,002 | 2 | -       | -     | - | -       | -     | - | 5,799  | 0,047 | 2 |
| 17 | -      | -     | - | 297,438 | 0,048 | 2 | 587,725  | 0,148 | 2 | -       | -     | - | -       | -     | - | -       | -     | - | 4,851  | 0,033 | 2 |
| 18 | -      | -     | - | 283,321 | 0,041 | 2 | 505,961  | 0,183 | 2 | -       | -     | - | -       | -     | - | -       | -     | - | 4,093  | 0,004 | 2 |
| 19 | -      | -     | - | 231,993 | 0,056 | 2 | 337,977  | 0,111 | 2 | -       | -     | - | -       | -     | - | -       | -     | - | 3,373  | 0,032 | 2 |
| 20 | -      | -     | - | 298,871 | 0,054 | 2 | 190,884  | 0,096 | 2 | -       | -     | - | -       | -     | - | -       | -     | - | 2,787  | 0,024 | 2 |
| 21 | -      | -     | - | 77,625  | 0,044 | 2 | 98,562   | 0,064 | 2 | -       | -     | - | -       | -     | - | -       | -     | - | 2,295  | 0,023 | 2 |
| 22 | -      | -     | - | 161,986 | 0,057 | 2 | 172,225  | 0,036 | 2 | -       | -     | - | -       | -     | - | -       | -     | - | 1,850  | 0,020 | 2 |
| 23 | -      | -     | - | 137,715 | 0,015 | 2 | 180,925  | 0,019 | 2 | -       | -     | - | -       | -     | - | -       | -     | - | 1,505  | 0,019 | 2 |
| 24 | -      | -     | - | 153,643 | 0,031 | 2 | 130,786  | 0,033 | 2 | -       | -     | - | -       | -     | - | -       | -     | - | 1,199  | 0,006 | 2 |
| 25 | -      | -     | - | 134,893 | 0,026 | 2 | 115,193  | 0,034 | 2 | -       | -     | - | -       | -     | - | -       | -     | - | 0,958  | 0,016 | 2 |
| 26 | -      | -     | - | 100,199 | 0,029 | 2 | 131,562  | 0,025 | 2 | -       | -     | - | -       | -     | - | -       | -     | - | 0,760  | 0,013 | 2 |
| 27 | -      | -     | - | 91,784  | 0,026 | 2 | 71,569   | 0,022 | 2 | -       | -     | - | -       | -     | - | -       | -     | - | 0,596  | 0,014 | 2 |
| 28 | -      | -     | - | 76,689  | 0,019 | 2 | 62,726   | 0,025 | 2 | -       | -     | - | -       | -     | - | -       | -     | - | 0,455  | 0,005 | 2 |
| 29 | -      | -     | - | 45,968  | 0,017 | 2 | 80,941   | 0,014 | 2 | -       | -     | - | -       | -     | - | -       | -     | - | 0,341  | 0,001 | 2 |
| 30 | -      | -     | - | 57,713  | 0,015 | 2 | 45,268   | 0,012 | 2 | -       | -     | - | -       | -     | - | -       | -     | - | 0,255  | 0,001 | 2 |
| 31 | -      | -     | - | 56,987  | 0,009 | 2 | 78,744   | 0,015 | 2 | -       | -     | - | -       | -     | - | -       | -     | - | 0,185  | 0,004 | 2 |
| 32 | -      | -     | - | 57,603  | 0,011 | 2 | 45,183   | 0,009 | 2 | -       | -     | - | -       | -     | - | -       | -     | - | 0,129  | 0,004 | 2 |
| 33 | -      | -     | - | 56,879  | 0,011 | 2 | 78,594   | 0,015 | 2 | -       | -     | - | -       | -     | - | -       | -     | - | 0,084  | 0,004 | 2 |

|       |              |   |   |        |       |   |        |       |   |   |   |   |   |   |   |   |   |   |       |       |   |
|-------|--------------|---|---|--------|-------|---|--------|-------|---|---|---|---|---|---|---|---|---|---|-------|-------|---|
| 34    | -            | - | - | 19,563 | 0,193 | 2 | 15,268 | 0,203 | 2 | - | - | - | - | - | - | - | - | - | 0,050 | 0,005 | 2 |
| 35    | -            | - | - | 10,068 | 0,193 | 2 | 11,068 | 0,203 | 2 | - | - | - | - | - | - | - | - | - | 0,026 | 0,007 | 2 |
| 36    | -            | - | - | 10,043 | 0,202 | 2 | 10,329 | 0,192 | 2 | - | - | - | - | - | - | - | - | - | 0,005 | 0,005 | 2 |
| <hr/> |              |   |   |        |       |   |        |       |   |   |   |   |   |   |   |   |   |   |       |       |   |
| -     | not detected |   |   |        |       |   |        |       |   |   |   |   |   |   |   |   |   |   |       |       |   |
